# Supplementary material for: Diversity, Distribution, Systematics and Conservation Status of Podocarpaceae
Source: MDPI journal article supplement (doi:10.3390/plants12051171), 2023-03-03
Supplement: s1 [file s1]

**Table S1.** Fossil taxa used for calibration of the phylogeny.

| S# | Fossil taxa                        | Period            | Minimum Age Constraint (Ma) | Reference                               |
|----|------------------------------------|-------------------|-----------------------------|-----------------------------------------|
| 1  | <i>Acmopyle florinii</i>           | Late Paleocene    | 57                          | Hill and Carpenter, 1991                |
| 2  | <i>Nageia hainanensis</i>          | Eocene            | 50                          | Liu et al., 2015                        |
| 3  | <i>Podocarpus witherdenensis</i>   | Eocene            | 37.2                        | Hill and Carpenter, 1991                |
| 4  | <i>Dacrycarpus puertae</i>         | Eocene            | 60                          | Wilf et al., 2012                       |
| 5  | <i>Dacrydium rhomboideum</i>       | Oligocene-Miocene | 28.4                        | Cookson and pike, 1953; Blackburn, 1985 |
| 6  | <i>Falcatifolium eocenica</i>      | Middle Eocene     | 37.2                        | Hill and Scriven, 1999                  |
| 7  | <i>Pherosphaera microfolius</i>    | Oligocene-Miocene | 28.4                        | Wells and Hill, 1989                    |
| 8  | <i>Microcachrys novaezelandiae</i> | Oligocene-Miocene | 28.4                        | Carpenter et al., 2011                  |
| 9  | <i>Halocarpus highstedii</i>       | Oligocene-Miocene | 28.4                        | Jordan et al., 2011                     |
| 10 | <i>Lagarostrobos marginatus</i>    | Oligocene         | 34                          | Wells and Hill, 1989                    |
| 11 | <i>Manoao colensoi</i>             | Oligocene         | 35                          | Carpenter, 1991                         |
| 12 | <i>Prumnopitys opihensis</i>       | Cretaceous/Eocene | 60                          | Pole, 1997                              |
| 13 | <i>Lepidothamnus</i>               | Middle Cretaceous | 120                         | Peter, 1985                             |
| 14 | <i>Phyllocladus annulatus</i>      | Oligocene         | 33                          | Hill, 1989                              |
| 15 | <i>Retrophyllum oxyphyllum</i>     | Eocene            | 50                          | Wilf, 2020                              |
| 16 | <i>Sundacarpus anglica</i>         | Eocene            | 48.6                        | Page, 2019                              |
| 17 | <i>Austrohamia minuta</i>          | Lower Jurassic    | 160                         | Bodnar and Escapa, 2016                 |
| 18 | <i>Agathis vittata</i>             | Eocene            | 55                          | Hill et al., 2008                       |
| 19 | <i>Araucaria</i>                   | Early Jurassic    | 190                         | Axsmith et al., 2008                    |
| 20 | Podocarp                           | Permian           | 255                         | Blomenkemper et al., 2018               |

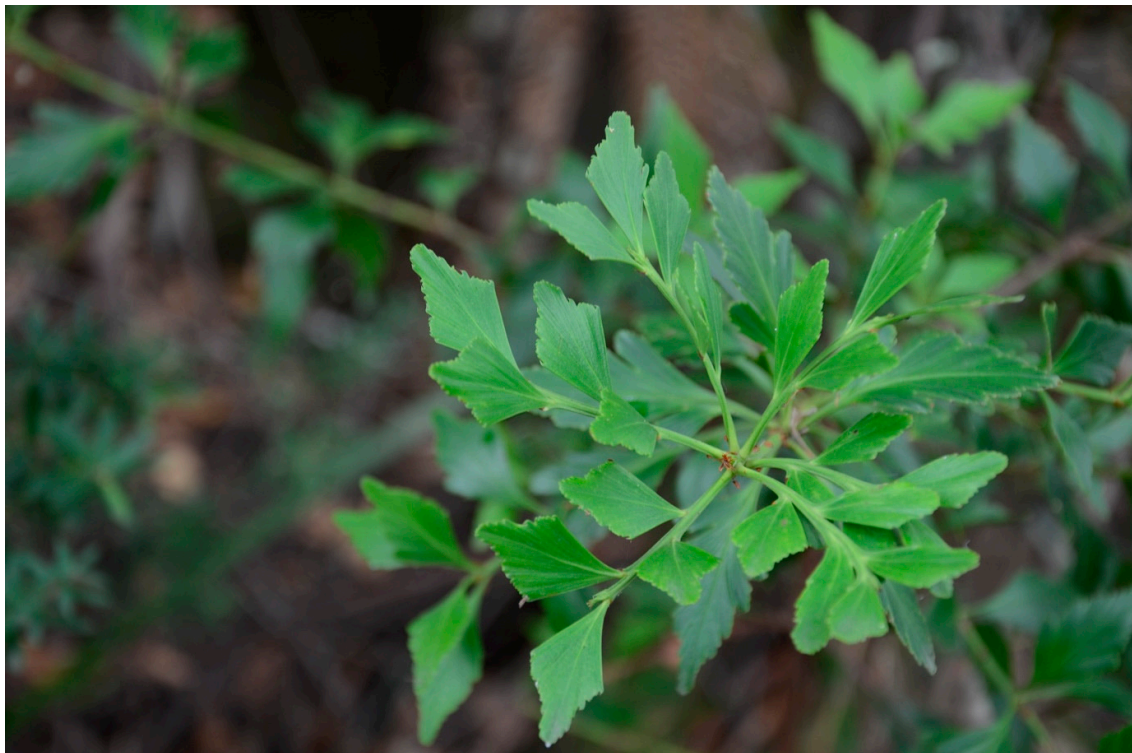

**Figure S1.** *Phyllocladus aspleniifolius* (with phylloclades) found in rainforest Tasmania.

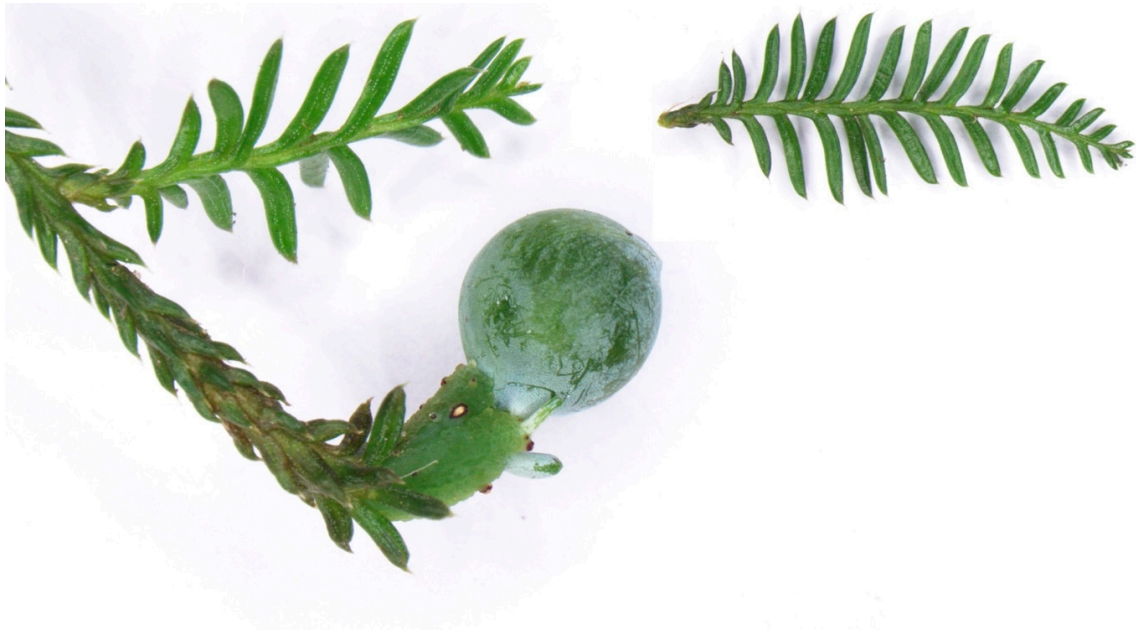

**Figure S2.** Leaf dimorphism in *Dacrycarpus dacrydioides*.
